# Supplementary material
Source: MDPI journal article supplement (https://www.mdpi.com/1996-1073/11/1/124)
Supplement: s1 [file s1]

Table S1. Review of cellulose-fed MFCs.

| cellulosic substrate type                     | MFC specification                                                                                 | inoculum                                                                  | microbial composition of inoculum                                                                                    | microbial composition after operation in MFC                                                                                                                                                | maximum power density [mW/m <sup>2</sup> ] | references |
|-----------------------------------------------|---------------------------------------------------------------------------------------------------|---------------------------------------------------------------------------|----------------------------------------------------------------------------------------------------------------------|---------------------------------------------------------------------------------------------------------------------------------------------------------------------------------------------|--------------------------------------------|------------|
| carboxymethyl cellulose                       | two-chamber (310 ml) MFC with graphite electrodes and ferricyanide catholyte                      | co-culture <i>Clostridium cellulolyticum</i> and <i>G. sulfurreducens</i> | co-culture <i>C. cellulolyticum</i> and <i>G. sulfurreducens</i>                                                     | <i>Clostridium cellulolyticum</i> ; <i>Geobacter sulfurreducens</i>                                                                                                                         | 143                                        | [13, 14]   |
| MN301 cellulose                               |                                                                                                   |                                                                           |                                                                                                                      |                                                                                                                                                                                             | 59.2                                       |            |
| cellulose from cotton linters<br>Sigmacell 50 | two-chamber (200 ml) MFC with carbon cloth anode, carbon fiber cathode and ferricyanide catholyte | <i>Enterobacter cloacae</i>                                               | <i>Enterobacter cloacae</i>                                                                                          | <i>Enterobacter cloacae</i>                                                                                                                                                                 | 4.9 – 5.4                                  | [9]        |
|                                               |                                                                                                   | paper recycling plant wastewater                                          | <i>Klebsiella pneumoniae</i> ; <i>Enterobacter cloacae</i> ; <i>Stenotrophomonas</i> sp.; <i>Exiguobacterium</i> sp. | not investigated                                                                                                                                                                            | 18                                         |            |
| cellulose powder (Sigmacell)                  | H-type MFC (50 ml) with graphite electrodes and ferricyanide catholyte                            | <i>Enterobacter cloacae</i> isolated from termite gut                     | <i>Enterobacter cloacae</i> isolated from termite gut                                                                | <i>Enterobacter cloacae</i> isolated from termite gut                                                                                                                                       | 185                                        | [7]        |
| cellulose from cotton linters<br>Sigmacell 20 | two-chamber MFC (0.9 l) with graphite electrodes and ferricyanide catholyte                       | cow rumen consortium                                                      | not investigated                                                                                                     | <i>Firmicutes</i> ( <i>Clostridium</i> sp.); <i>Betaproteobacteria</i> ( <i>Comamonas</i> sp.)                                                                                              | 55                                         | [15]       |
| wheat hydrolysate                             | two-chamber (300 ml) MFC with carbon paper electrodes and ferricyanide catholyte                  | primary clarifier of wastewater treatment plant                           | not investigated                                                                                                     | <i>Bacteroidetes</i> ( <i>Dysgonomonas wimpennyi</i> ), <i>Alphaproteobacteria</i> , <i>Bacillus</i> , <i>Deltaproteobacteria</i> ( <i>G. metallireducens</i> ), <i>Gammaproteobacteria</i> | 123                                        | [16]       |

|                                                  |                                                                                      |                                                                                                                        |                                                                               |                                                                                                               |                                             |           |
|--------------------------------------------------|--------------------------------------------------------------------------------------|------------------------------------------------------------------------------------------------------------------------|-------------------------------------------------------------------------------|---------------------------------------------------------------------------------------------------------------|---------------------------------------------|-----------|
| cellulose from cotton linters<br>Sigmacell 50    | two chamber (200 ml) MFC with carbon paper anode and carbon paper/Pt cathode         | sludge from wastewater treatment plant                                                                                 | not investigated                                                              | not investigated                                                                                              | 12<br><br>100 when cellulase was added      | [17]      |
| Avicel cellulose                                 | two-chamber (450 ml) MFC graphite electrodes and occasionally ferricyanide catholyte | rice paddy field soil                                                                                                  | not investigated                                                              | <i>Rhizobiales, Clostridiales, Chloroflexi, Methanobacterium</i>                                              | 10                                          | [18]      |
| cellulose (Sigma)                                | H-type MFC with carbon paper electrodes and ferricyanide catholyte                   | cellulose degrading strains: <i>Streptomyces enissocaeilis</i> and <i>Nocardiopsis sp.</i>                             | <i>Streptomyces enissocaeilis</i> and <i>Nocardiopsis sp.</i>                 | not investigated                                                                                              | 145-162 when cellobioase was added          | [8]       |
| corn stover                                      | air-cathode single chamber MFC (300 ml)                                              | municipal wastewater                                                                                                   | not investigated                                                              | <i>Rhodopseudomonas palustris, Clostridium sp.</i>                                                            | 6-10<br><br>331 with glucose preacclimation | [19]      |
| diluted hydrolysates of corn stover              | air-cathode single chamber MFC (28 ml)                                               | domestic wastewater                                                                                                    | not investigated                                                              | not investigated                                                                                              | 475                                         | [20]      |
| paper recycling wastewater                       | air-cathode single chamber MFC (300 ml)                                              | paper recycling wastewater                                                                                             | not investigated                                                              | not investigated                                                                                              | 501                                         | [21]      |
| cellulose from cotton linters<br>Sigmacell 20    | air-cathode single chamber MFC (42 ml)<br><br>two-chamber MFC (42 ml)                | bacterial suspension from two-chamber, aqueous-cathode microbial electrolysis cell inoculated with domestic wastewater | not investigated                                                              | <i>Clostridium Thermocellum, Geobater sulfurreducens, Clostridium cellulolyticum</i>                          | 1070<br><br>880                             | [22]      |
| cellulose fibers from cotton linters Sigma C6288 | air-cathode single chamber MFC (28 ml)                                               | cow manure                                                                                                             | <i>Firmicutes (Clostridium sp.)</i> and <i>Proteobacteria (Comamonas sp.)</i> | <i>Bacteroidetes (Parabacteroides, Proteiniphilum)</i> and <i>Firmicutes (Clostridium sp., Catonella sp.)</i> | 44                                          | this work |

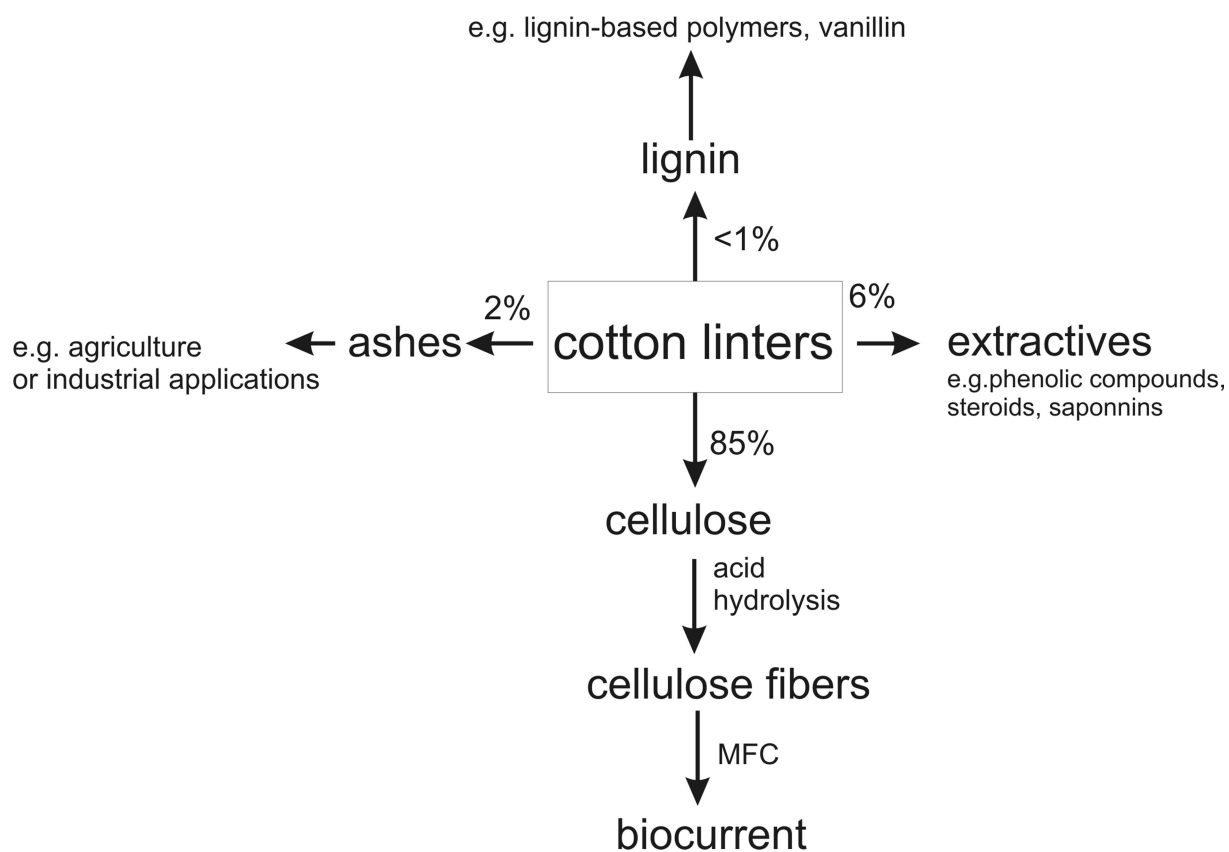

**Figure S1.** Schematic presentation of possible use of cellulose and cotton linter residues.
